# Supplementary material for: Genomic Sequence Diversity and Population Structure of Saccharomyces cerevisiae Assessed by RAD-seq
Source: PubMed Central journal article supplement (PMC3852379; doi:10.1534/g3.113.007492), 2013-10-11
Supplement: supp_g3.113.007492_007492SI.pdf [file supp_g3.113.007492_007492SI.pdf]

## Genomic Sequence Diversity and Population Structure of *Saccharomyces cerevisiae* Assessed by RAD-seq

Gareth A. Cromie<sup>\*,1</sup>, Katie E. Hyma<sup>§,1</sup>, Catherine L. Ludlow<sup>\*</sup>, Cecilia Garmendia-Torres<sup>\*</sup>, Teresa L Gilbert<sup>2</sup>, Patrick May<sup>\*,‡</sup>, Angela A. Huang<sup>†</sup>, Aimée M. Dudley<sup>\*</sup>, Justin C. Fay<sup>§§</sup>

\* Institute for Systems Biology, Seattle, WA, USA

§ Bioinformatics Facility (CBSU), Institute for Biotechnology, Cornell University, Ithaca, NY, USA

‡ Luxembourg Centre for Systems Biomedicine, University of Luxembourg, Esch-sur-Alzette, Luxembourg

† University of Pennsylvania, PA, USA

§§ Department of Genetics, Washington University, St. Louis, MO, USA

<sup>1</sup> These authors contributed equally to this work.

<sup>2</sup> Deceased

### Running Title:

Population Structure of *Saccharomyces cerevisiae*

### Keywords:

RAD-seq, yeast, phylogenetics, population structure, genetic diversity

### Corresponding Authors:

Aimée M. Dudley

Institute for Systems Biology

401 Terry Avenue North

Seattle, WA 98109

Email: aimee.dudley@gmail.com

Tel: (206) 732-1214

Justin C. Fay

Washington University School of Medicine

4444 Forest Park Pkwy

St. Louis, MO 63108

Email: jfay@genetics.wustl.edu

Tel: (314) 747-1808



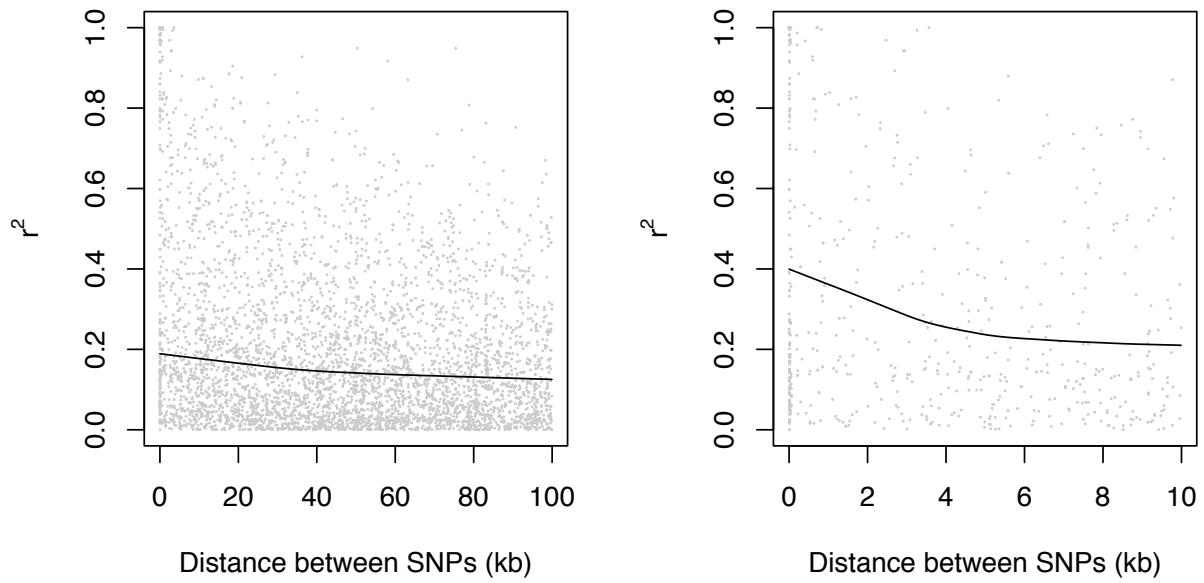

**Figure S2** Linkage disequilibrium as a function of physical distance. Points show the square of the correlation coefficient ( $r^2$ ) between each pair of 759 common SNPs as a function of distance for sites within 100 kb of one another (A) and for sites within 10 kb of one another (B).

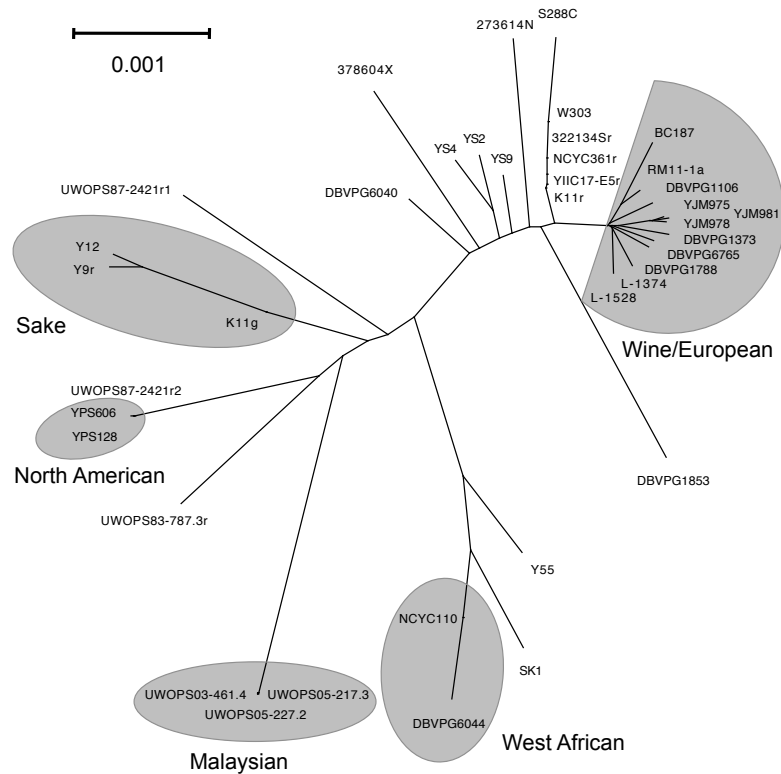

**Figure S3** RAD-seq neighbor-joining tree of the 38 *S. cerevisiae* strains used in both this study and a previous population analysis that used whole genome sequencing (compare to LIT1 *et al.* 2009 Figure 1C). Branch lengths are proportional to sequence divergence measured as P-distance. Scale bar indicates 10 polymorphisms/ 10 kb of sequence. The 2 divergent positions for strain K11 are likely caused by mislabeling of the strain used for the “K11r” sequencing. Strains comprising the 5 lineages identified in LIT1 *et al.* 2009 have been labeled (North America, Sake, Malaysian, West African, Wine/European).

## Supporting Data and Tables

Available for download at <http://www.g3journal.org/lookup/suppl/doi:10.1534/g3.113.007492/-/DC1>

**File S1** Matrix of polymorphic sites. The matrix consists of 5,868 bi-allelic sites (columns) and 262 strains (rows) with column labels indicating the chromosome number and position separated by a period. Genotypes are represented by 0 or 2 for homozygotes, 1 for heterozygotes and -9 for missing data. Entries are comma delimited.

**File S2** Neighbor-joining tree of 262 *S. cerevisiae* strains based on multiple alignment of 116,880 bases. This tree is a version of Figure 1 that includes strain labels and the maximum group membership from Figure 2 and is in Newick format to allow visualization with phylogenetic tree viewing software.

**Table S1** Strains used in this study, with population assignments inferred by InStruct.

**Table S2** Populations inferred using InStruct and summary statistics.

**Table S3** Fit of the population structure model as a function of the number of populations.
