# Supplementary material for: Genomic Sequence Diversity and Population Structure of Saccharomyces cerevisiae Assessed by RAD-seq
Source: PubMed Central journal article supplement (PMC3852379; doi:10.1534/g3.113.007492), 2013-10-11
Supplement: supp_g3.113.007492_FigureS1.pdf [file supp_g3.113.007492_FigureS1.pdf]

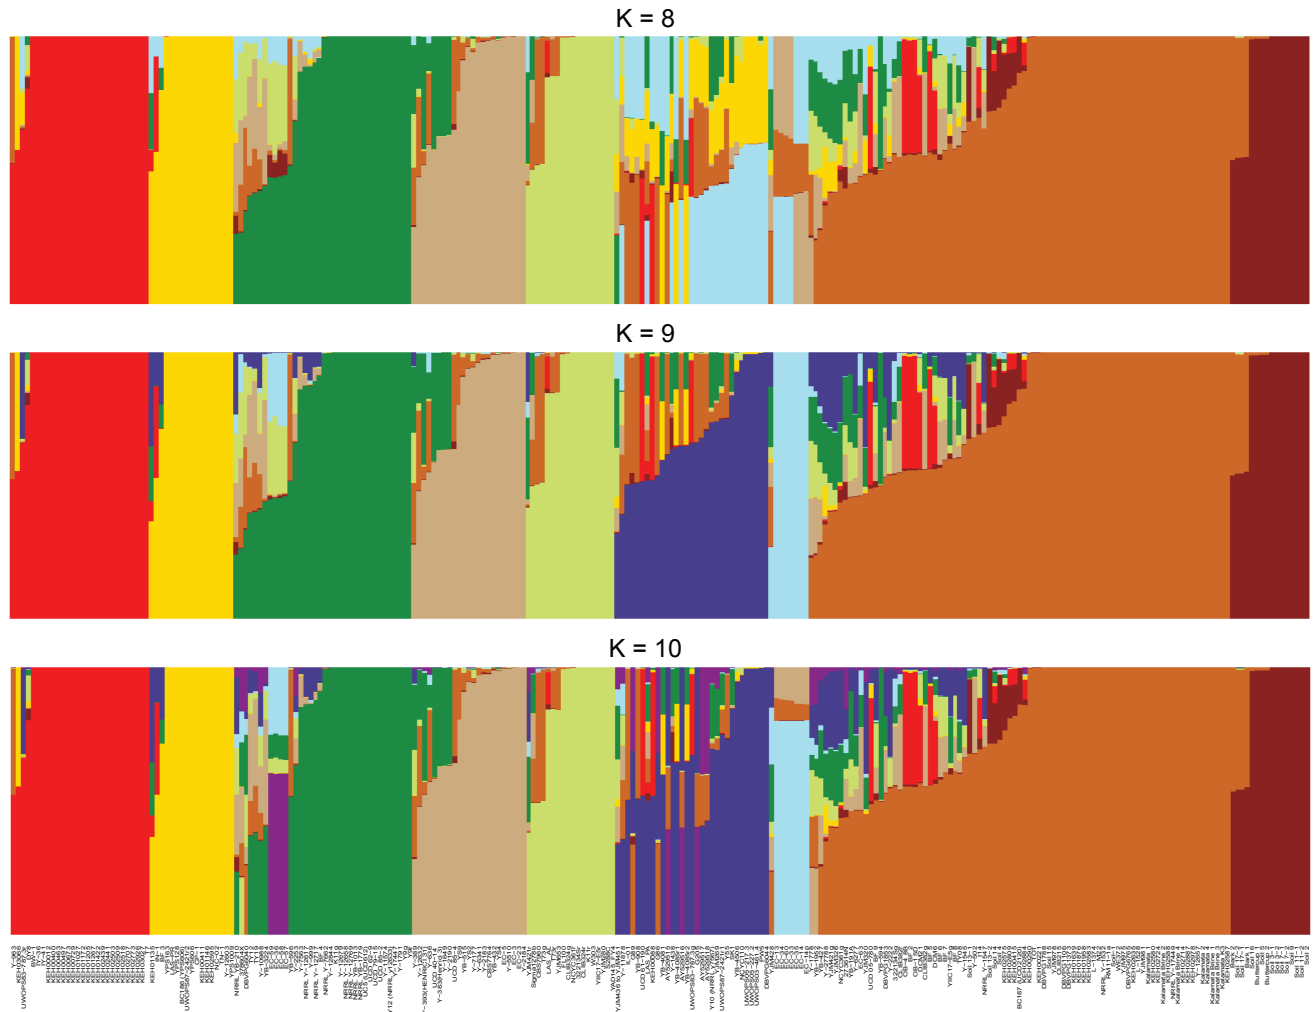

**Figure S1** Population ancestry of strains inferred by InStruct. Populations are color-coded and the proportion of population ancestry assigned to each strain is indicated by bar height. Strain ancestry is shown assuming 8, 9 and 10 populations (K), with the order of strains based on K = 9 and color-coding of major populations matching that of K = 9.
