# Supplementary material for: Genomic Sequence Diversity and Population Structure of Saccharomyces cerevisiae Assessed by RAD-seq
Source: PubMed Central journal article supplement (PMC3852379; doi:10.1534/g3.113.007492), 2013-10-11
Supplement: supp_g3.113.007492_FigureS2.pdf [file supp_g3.113.007492_FigureS2.pdf]

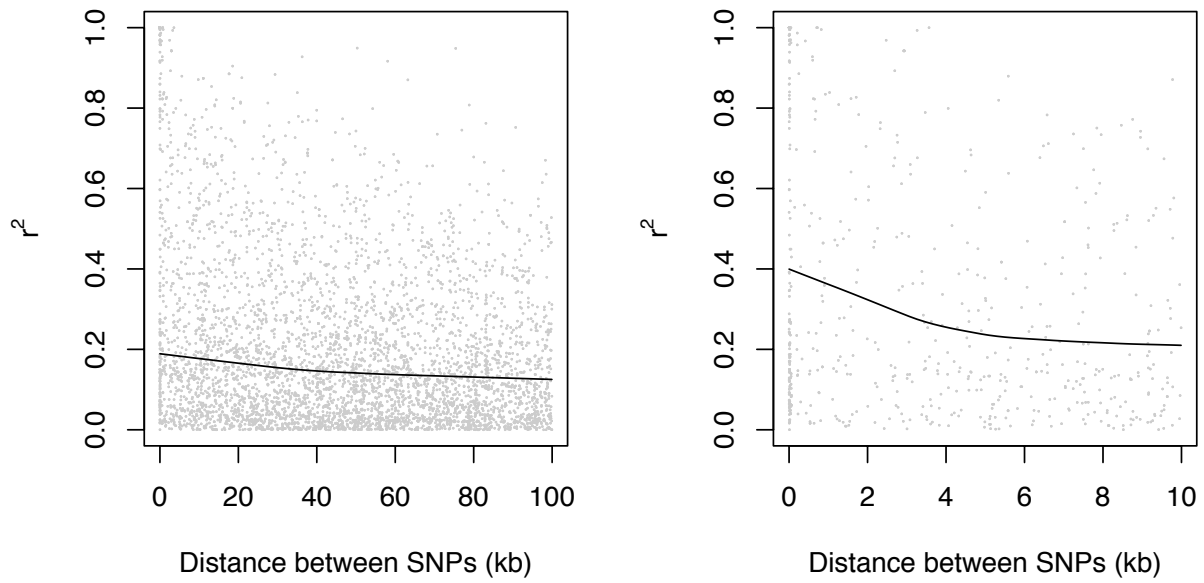

**Figure S2** Linkage disequilibrium as a function of physical distance. Points show the square of the correlation coefficient ( $r^2$ ) between each pair of 759 common SNPs as a function of distance for sites within 100 kb of one another (A) and for sites within 10 kb of one another (B).
