# Supplementary material for: Genomic Sequence Diversity and Population Structure of Saccharomyces cerevisiae Assessed by RAD-seq
Source: PubMed Central journal article supplement (PMC3852379; doi:10.1534/g3.113.007492), 2013-10-11
Supplement: supp_g3.113.007492_FigureS3.pdf [file supp_g3.113.007492_FigureS3.pdf]

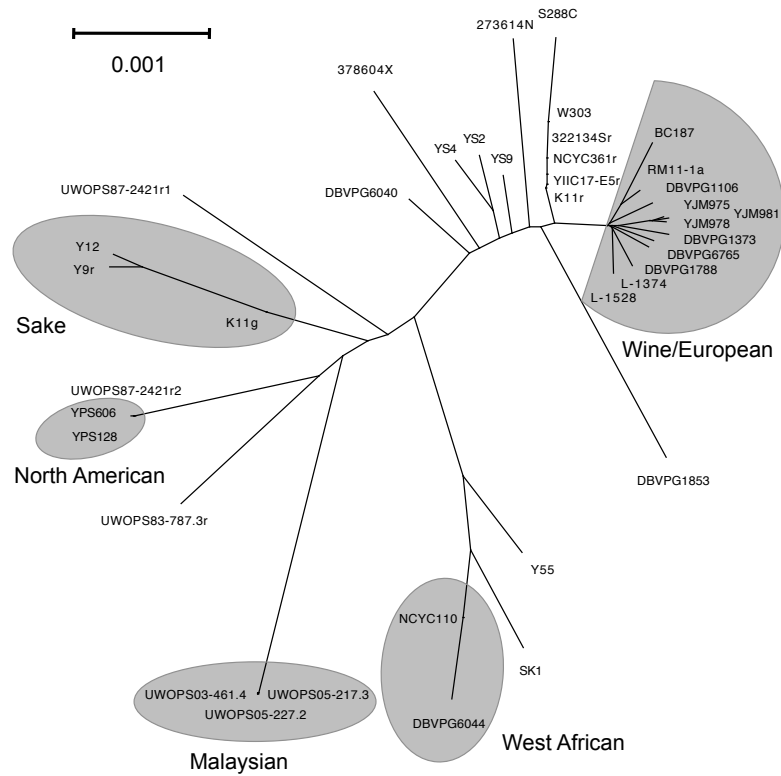

**Figure S3** RAD-seq neighbor-joining tree of the 38 *S. cerevisiae* strains used in both this study and a previous population analysis that used whole genome sequencing (compare to LIU *et al.* 2009 Figure 1C). Branch lengths are proportional to sequence divergence measured as P-distance. Scale bar indicates 10 polymorphisms/ 10 kb of sequence. The 2 divergent positions for strain K11 are likely caused by mislabeling of the strain used for the “K11r” sequencing. Strains comprising the 5 lineages identified in LIU *et al.* 2009 have been labeled (North America, Sake, Malaysian, West African, Wine/European).
